1 **Importance of agriculture for Crop Wild Relatives conservation in Switzerland**

2

3 Blaise Petitpierre<sup>\*1</sup>, Julie Boserup<sup>1</sup>, Adrian Möhl<sup>1</sup>, Sibyl Römetsch<sup>1</sup>, Sylvain Aubry<sup>\*2,3</sup>

4

5 <sup>1</sup> Infoflora, c/o Botanischer Garten, Altenbergrain 21, CH-3013 Bern, Switzerland

6 <sup>2</sup> Federal Office for Agriculture, CH-3003 Bern, Switzerland

7 <sup>3</sup> Department of Plant and Microbial Biology, University of Zürich, Zollikerstrasse 107, CH-  
8 8008, Zürich, Switzerland

9

10 \*corresponding authors: [blaise.petitpierre@infoflora.ch](mailto:blaise.petitpierre@infoflora.ch), [sylvain.aubry@blw.admin.ch](mailto:sylvain.aubry@blw.admin.ch)

11

12

13 **Abstract**

14 Crop Wild Relatives are a subset of the global plant diversity that is often neglected, as not  
15 the primary focus for conservationists or plant breeders. However, a relatively large portion  
16 of the wild flora, up to 60% in Switzerland for example, do share genetic relationships with  
17 cultivated species and therefore can be considered as Crop Wild Relatives. Their  
18 conservation appears simultaneously a challenge to conservation programmes but also a  
19 considerable levy to mobilize other sectors, like agriculture, to contribute to the conservation  
20 of biodiversity at large. Here, we provide a comprehensive checklist of Swiss Crop Wild  
21 Relatives representing 2,226 taxa, of which 285 prioritised taxa, referred to as “Crop wild  
22 relatives Of Concern”, were designated. Following a taxa-specific ecogeographic analysis,  
23 we analysed the extent to which CWR of concern are already contained in existing protected  
24 areas as well as their distribution in the agricultural area. Prioritised Crop Wild Relatives  
25 species richness was compared to modelled species richness to identify potential  
26 conservation gaps. About a fifth of CWR of concern is not significantly better protected than  
27 a random species by existing protected areas. However, 28.8 % and 15.5 % of these taxa  
28 are more frequently distributed in agricultural and summer grazing areas respectively than  
29 random expectations. A clear deficit of species richness for these Crop Wild Relatives of  
30 concern was inferred on low lands, possibly related to a lower sampling effort. We further  
31 identified a network of 39 sites that contains all taxa of Swiss CWR of concern and that  
32 could be used as a primary conservation infrastructure. More generally, our results could be  
33 generalized to other countries and support better consideration of CWR in agriculture areas,  
34 an important “reservoir” for expanding specific measures of conservation that are crucial to  
35 meet the future global goals of diversity conservation frameworks.

36

37 **Keywords**

1 Crop Wild Relatives, CWR of concern, plant genetic diversity, species distribution modelling,  
2 protected area, food security

3

4

## 5 **Introduction**

6 Crop diversity, across and within species, is a major driver of agricultural resilience.  
7 However, it is estimated that seventy-five per cent of crop diversity was lost globally during  
8 the 20<sup>th</sup> century (FAO 2010). The loss of allelic diversity in crops is partly inherent to the  
9 breeding process but also due to a wide range of other socio-economic factors that gradually  
10 led to the narrowing genetic basis used for breeding (Hajjar & Hodgkin 2007; Khoury et al.  
11 2022). Indeed, most crops originated from the domestication of wild ancestors (Engels &  
12 Thormann 2020). Therefore, attempts to identify and save Crop Wild Relatives (CWR,  
13 Maxted et al. 2006) appear as a priority to ensure a viable future for the next generations of  
14 farmers and breeders and eventually improve food security. More generally, CWRs often  
15 represent a very large portion of the wild flora (Maxted et al. 2006) and a better focus on  
16 their conservation may actually raise unexplored levies, that in turn could be essential for  
17 biodiversity conservation at large.

18 Many breeding programs increase their genetic basis by integrating CWR: for example,  
19 the resistance to late blight (*Phytophthora infestans*) from the wild potato *Solanum*  
20 *demissum* or the stem rust resistance (*Puccinia graminis*) from wheat's CWR *Aegilops*  
21 *tauschii* (Hajjar & Hodgkin 2007; Dempewolf et al. 2017). Since the CWR concept has been  
22 described in the seventies, growing international momentum for their conservation has  
23 emerged, side-by-side with the efforts aimed at global biodiversity conservation (Harlan &  
24 Wet 1971; Maxted et al. 2006). Recently, global (Maxted et al. 2012; Castañeda-Álvarez et  
25 al. 2016; Vincent et al. 2019) as well as national (Rubio Teso et al. 2021) inventories of  
26 CWR revealed an urgent need for measures to preserve CWR diversity. Many countries  
27 performed their own CWR inventory, for example, Portugal (Brehm et al. 2008), Norway  
28 (Phillips et al. 2016), the Czech Republic (Taylor et al. 2017), the UK (Jarvis et al. 2015),  
29 Netherland (Treuren et al. 2017), Turkey (Tas et al. 2019), USA (Khoury et al. 2013), mostly  
30 pursuing similar aims but slightly divergent methodologies. The procedure typically  
31 comprises several successive steps: inventory, prioritisation and identification of potential  
32 "hot spots" for their conservation, often referred to as gap analysis (Maxted et al. 2007). In  
33 addition, metrics representative of the relative importance of crops for agriculture could be  
34 scored, as it has been performed globally, to inform food security policy (Castañeda-Álvarez  
35 et al. 2016).

36 In Switzerland, a national action plan to conserve crops *in situ* and *ex situ* has been  
37 implemented since 1999. It is not primarily focusing on CWR and has only partially

1 succeeded in counteracting the decrease in agrobiodiversity (Guntern et al. 2013). Swiss  
2 agriculture covers about a third of the country's surface and therefore represents major  
3 pressure on ecosystems (FOAG & FOEN 2013; Guntern et al. 2013). The most recent data  
4 showed that more than half of the habitats and 36% of all species are threatened or near-  
5 threatened (Guntern et al. 2013). Interestingly, Swiss farmers are entitled to public  
6 subsidies, in the form of direct payment following a “cross-compliance” scheme. These  
7 subsidies are conditioned to a set of practices and provide proof of ecological performance  
8 (Jarrett & Moser 2013). Briefly, this entails limited fertilization and pesticide use, crop  
9 rotation, animal welfare measures and 7% of the land allocated as ecological compensation  
10 area (ECA). Based on the overwhelming influence of cultivated areas on wild ecosystems,  
11 we wondered how prevalent the agricultural areas, their various mode of management and  
12 their associated public subsidies could underpin CWR and more generally plants  
13 conservation. To answer this question, we first built a comprehensive checklist of CWR in  
14 Switzerland using a floristic approach (Maxted et al. 2006). We then derived a list of “CWR  
15 of Concern” (CoC) taxa. The CoC concept allows us to effectively merge conservation and  
16 utilization concerns without taking the risk of confusion with the generally used  
17 “priority/prioritisation” for threatened species. The list of CoC contains therefore either CWR  
18 that need conservation measures and CWR that are very closely related to cultivated crops.  
19 We then performed an extensive ecogeographical analysis of CoC using observed and  
20 modelled species distributions. Subsequently, we evaluated the extent to which CoC are  
21 already protected under various “conventional” measures (parks and other protected areas).  
22 Finally, we measured the actual overlap between CoC distribution, the agricultural land, their  
23 dedicated ECA and identified a minimal network of sites that include all CoC across  
24 Switzerland.

25 Combining data on the state of CWR conservation and their overlap with agricultural areas  
26 in Switzerland, we draw some conclusions on ways to improve conservation policies. We  
27 believe our approach could be generalised to other countries and can improve consideration  
28 of the link between land management and public action in sustaining CWR conservation and  
29 biodiversity more generally.

30

## 31 **Methods**

### 32 *List of crops with relevant use in Swiss agriculture*

33 A list of 129 crops for food and feed that are grown in Switzerland was built (Appendix  
34 S1). It contains major and minor crops as defined by Houry et al. (Houry et al. 2013). This  
35 comprises all species from Annex 1 of the International Treaty for Plant Genetic Resources  
36 for Food and Agriculture and all crops contained in the Swiss national databank for  
37 cultivated plants (FOAG 2022) and trade data. In addition, a list of the most common forage

1 species was obtained using the latest Swiss forage crop recommendations (Suter et al.  
2 2019) as well as a list of modern medicinal plants from a published ethnobotanical survey  
3 (Cero et al. 2014). Species cultivated as aromatics were collated with help from local  
4 experts.

5

#### 6 *Swiss CWR checklist and prioritization*

7 A CWR checklist was created for Switzerland primarily based on information from the  
8 Crop Wild Relative Catalogue for Europe and the Mediterranean (Kell et al. 2008, updated  
9 version by Maxted & Kell, personal communication). Using a floristic approach, taxa  
10 information was updated and harmonized with the latest version of the checklist of the Swiss  
11 Flora published (Infloflora 2017).

12 We then linked every possible taxon out of the 2,226 CWR from the checklist with a given  
13 utilization, based on our initial crop list (Appendix S1), namely primary or secondary food,  
14 forage, medicinal, aromatic, industrial, restoration, forestry and ornamental (Table 2 and  
15 Appendix S2). We considered any species contained in a genus having at least one reported  
16 use was considered as a CWR (or a wild-used species, no distinction has been made).  
17 Compiling data from published checklists from other European countries and the US (Brehm  
18 et al. 2008; Khoury et al. 2013; Fielder et al. 2015; Phillips et al. 2016; Taylor et al. 2017;  
19 García et al. 2017), we analysed the extent of the relationship between crops and their  
20 respective CWR, defined by either the Gene Pool (GP) and the Taxon Group (TG) concepts  
21 (Harlan & Wet 1971; Maxted et al. 2006).

22 We prioritized a shorter list of CoC, for which conservation measures should be ensured  
23 to maintain genetic diversity among populations. Four criteria have been selected and  
24 scoring applied on a scale from 1 (low priority) to 5 (high priority): 1. if a known relationship  
25 of the CWR to a currently cultivated crop in Switzerland was described, a high priority score  
26 was given; 2. if a CWR had a close relationship to a crop, a higher score was attributed  
27 (GP1/TG1>TG/GP2>TG3>TG4); 3. conservation status was assigned based on the IUCN  
28 red list classification, with 5 points to taxa classified as critically endangered (CR), 4 to  
29 endangered (EN), 3 to vulnerable (VU), 2 to near threatened (NT) and 1 to least concerned  
30 (LC); 4. Finally, the origin of the taxa was taken into consideration, with a maximum priority  
31 score (5) for indigenous and archeophytes, a score of 2 for European neophytes, and a  
32 score of 1 for neophytes. Finally, the list of CoC was submitted to expert advice that took  
33 into consideration interests for breeding and use in Swiss agriculture. Results from the first  
34 expert consultation performed by Häner et al (Häner et al. 2009) were also compiled and  
35 integrated.

36

#### 37 *Species distribution, protected area and agricultural surface*

1 To identify species richness, observations of CoC recorded between 01/01/2002 and  
2 31/12/2019 were extracted from the database of the Swiss national data centre for vascular  
3 plants (Infoflora, 2020). Cultivated or sub-spontaneous occurrences were removed, so as  
4 occurrences with an uncertainty > 250 m. To avoid duplication, species observations were  
5 disaggregated keeping a minimal distance of 100 m between occurrences. In total, 567'319  
6 observations were used in the analysis.

7 To summarize a comprehensive set of protected areas over the country we combined the  
8 geographical layers of Federal inventories (FOEN 2018), the natural reserves managed by  
9 Pro Natura, forest reserve (FOEN 2018) and the Swiss National Park were bulked together.  
10 The agricultural surface has been determined using data from (Szerencsits et al. 2018), with  
11 a distinction between the actual agriculture surface and the surfaces dedicated to summer  
12 grazing being retained.

13 To assess if the distribution of each CoC was significantly overlapping the protected areas,  
14 we generated 1,000 random distributions. These random distributions consist of 1'991 points  
15 (corresponding to the average number of occurrences among the CoC), sampled following  
16 the sampling bias found in the Infoflora database (Fig. 1). For each randomization, we  
17 measured the proportion of the random distributions covered by the protected area, allowing  
18 us to test if the taxa were significantly more protected by the existing protection area than  
19 expected by chance.

20

### 21 *Species distribution modelling*

22 Species distribution models (SDMs) relate species occurrences to environmental factors.  
23 Once this relation is statistically quantified, it is then possible to derive predictions of species  
24 potential distributions if the predictors are spatially explicit (Guisan & Thuiller 2005; Elith &  
25 Leathwick 2009). SDMs are particularly useful for conservation practices (Guisan et al.  
26 2013). In this study, we built potential distribution maps derived from SDMs for every taxon  
27 with enough observations ( $n = 10$ ). For each species, predictors were selected from an initial  
28 set of 33 variables including information about the topography, climate, soil and remote  
29 sensing (Appendix S3). A preliminary variable selection was processed for each taxon to  
30 reduce the number of predictors and avoid model overfitting. After this initial step, the  
31 number of variables varied between two and nine, depending on the species (Appendix S4).  
32 These predictors were related to species occurrences by combining three modelling  
33 algorithms (general additive models, Maxent and gradient boosting model) into an ensemble  
34 modelling approach (Thuiller et al. 2004; Araujo & New 2007), or an ensemble of small  
35 models (ESM, Breiner et al. 2015) depending on the number of observations (Appendix S4).  
36 Models were evaluated with 4-fold cross-validation with an index combining 4 commonly  
37 used indices of accuracy (AUC,  $TSS_{max}$ , Sensitivity and continuous Boyce index, Appendix

1 S4). This index is analogous to a correlation varying between -1 (total counter predictions)  
2 and 1 (perfect predictions), 0 meaning random predictions.

3

#### 4 *Patterns of species richness*

5 We estimated the difference between the modelled and the observed species richness to  
6 map the deficit between the observed and the modelled number of CoC species. Because  
7 the stacking of SDM maps is known to be sensitive to the threshold used to binarize  
8 continuous suitability maps (Benito et al. 2013; Calabrese et al. 2014; Schmitt et al. 2017),  
9 we applied five different thresholding criteria to reclassify the individual species suitability  
10 maps into potential presences and absences (Appendix S4). As modelled species richness  
11 obtained by stacking SDM maps tends to be overestimated (Guisan & Rahbek 2011;  
12 Calabrese et al. 2014), we applied a quantile normalization between the map of the  
13 observed number of species and the modelled number of species. Quantile normalization  
14 was initially developed for the analysis of high-throughput data in molecular biology  
15 (Amaratunga & Cabrera 2001; Bolstad et al. 2003). In our case, it allows standardizing all  
16 the distributions of richness (observed and modelled) with the same minimal and maximal  
17 values, while keeping their statistical properties (Hicks & Irizarry 2015). Finally, we included  
18 the sampling effort to interpret the deficit between modelled and observed distributions. We  
19 gathered all observations for all the plant taxa recorded in the database of Infloflora between  
20 2001 and 2019 and categorized areas with a high ( $\geq 500$  observations per km<sup>2</sup>) and low  
21 sampling effort (respectively  $\geq 500$  and  $< 500$  observations per km<sup>2</sup>).

22

#### 23 *Complementary analysis to delimit a minimal conservation network*

24 A complementary analysis was carried out to obtain a spatial network that most efficiently  
25 covers CoC species. We selected the site with the highest number of taxa, excluded these  
26 taxa from the analysis and iteratively repeated this process until all taxa were covered  
27 (Rebelos 2014). This analysis was applied to the observations of the 285 CoC species  
28 distributed on a 4 km<sup>2</sup> grid. All the data analysis was run with a custom R script available on  
29 demand (version 4.0.3; R Core Team 2020).

30

## 31 **Results**

### 32 *Swiss CWR checklist and prioritization*

33 A total of 3,006 taxa were identified as CWR, representing about 60% of the described  
34 Swiss flora (Table 1). Among those, taxa classified as invasive neophytes species as well as  
35 taxa related to ornamentals were removed, leaving 2,226 CWR, of which 2,045 related to  
36 any agricultural use (namely food, feed, medicinal, aromatic, restoration). For prioritization  
37 purposes, ornamentals were removed as they represent a very large portion of the flora.

1 Noteworthy, while the conservation status of various taxa has been extensively documented  
2 (Red list, priority species), only a relatively small proportion of CWR relationships have been  
3 reported. For example, information about the genetic relationship to their crop (gene pool)  
4 could only be documented from the literature for 140 out of 340 CWR taxa of food crops  
5 (Appendix S2).

6 Based on four criteria: the relationship to a species used in the Swiss agroecosystem, the  
7 genetic distance to a specific crop, its conservation status and its origin, 285 CWR were  
8 considered as “CWR of concern”. Importantly, we also considered 18 CWR of crops not  
9 grown in Switzerland, like *Setaria*, and *Hedysarum*). While Switzerland does not hold formal  
10 responsibility for such taxa, safeguarding some of the genepools that may be useful for other  
11 agrosystems seems reasonable in view of global climate change. To validate this list, we  
12 compiled expert data available (Häner et al., 2009) and new data to evaluate the relevance  
13 of this list to breeding and conservation sectors. This allowed, for example, to integrate into  
14 the CoC list, species like *Artemisia annua L.* or *Rhodiola rosea L.*, where local research for  
15 medicinal application and breeding has been undergone (Simonnet et al. 2008; Vouillamoz  
16 et al. 2012). Among the 257 taxa (out of 285 CoC) with a national red list conservation  
17 status, 148 are least-concerned (LC; 51.9%), 21 near-threatened (NT; 7.4%), 49 vulnerable  
18 (VU; 17.2%), 24 endangered (EN; 8.4%) and 15 critically endangered (CR; 5.3%) taxa.  
19 Among the CoC, 92 taxa (32.3 %) taxa belong to the list of the National Priority Species  
20 requiring conservation measures (FOEN 2019).

21

#### 22 *Distribution, richness and deficit areas of priority CWR in situ*

23 The areas with the highest CWR taxa richness were found in the northwest region of the  
24 country at relatively lower altitudes (Figure 1a). The observed richness is correlated with the  
25 sampling effort (Spearman correlation between the number of observations and species  
26 richness at a 1km<sup>2</sup> resolution:  $r_s = 0.799$ ,  $n = 39'961$ ,  $P < 0.001$ ; Figure 1c).

27 SDMs were generated for 265 of the 285 priority CWR (Appendix S5). For 20 taxa, the  
28 reduced number of observations available from the database (< 10) could not generate  
29 reliable modelling. These 20 taxa are composed of 10 known rare species covered by the  
30 national Red List belonging to the National Priority Species list, 7 subspecies requiring  
31 expert knowledge to reach this determination level and 3 taxa with very few documented  
32 observations in Switzerland. The consensus evaluation index varies between 0.4 and 0.968  
33 (with an average of 0.774), supporting that the modelled distributions are accurate. For each  
34 CoC taxa, like for example *Allium lineare* (Figure 2b), maps representing observations,  
35 habitat suitability and potential distributions were generated (Appendix S5). For *Allium*  
36 *lineare*, clear potential distribution was flagged in Wallis and Graubünden (Figure 2c & d).  
37 Only 10 species were modelled with an accuracy below 0.6 (Appendix S6). These 10 taxa

1 were removed from the analysis of the deficit, in addition to the 20 taxa with insufficient  
2 observations. Therefore, the comparison between observed and modelled distributions of  
3 the species richness was done with 255 species accurately modelled.

4 Not surprisingly, the modelled and observed distribution of CoC are correlated (Spearman  
5 correlation between observed and modelled species richness at a 1km<sup>2</sup> resolution: average  
6 rs across the 5 thresholding methods = 0.491 ± 0.016, n = 39'961, P < 0.001; Figure 1a and  
7 b). The modelled richness correlates with the sampling effort much less than the observed  
8 species richness (Spearman correlation between the number of observations and the  
9 modelled species richness at a 1km<sup>2</sup> resolution: average rs across the 5 thresholding  
10 methods 0.412 ± 0.019, n = 39'961, P < 0.001, Figure 1).

11 The comparison between the observed and potential species richness shows an important  
12 deficit at the lowland elevation, with some obvious gaps in regions like the Swiss Plateau,  
13 Wallis, Ticino and Graubünden. However, it appears that most of this deficit appears in  
14 areas with a low sampling effort. In areas with higher sampling effort, there is less deficit  
15 (Figure 1d).

16

#### 17 *Distribution of CWR of concern in protected and agricultural areas*

18 On average, CoC have 33 ± 21.4 % of their distribution located within protected areas  
19 (Table 3). This is significantly more than the distributions of the null model (13.9 ± 0.1 %; p-  
20 val. of a two-sample t-test < 0.001; Table 3). However, 64 species (22.5 % of the CoC) are  
21 not significantly more protected than a random species (Appendix S7). Taking advantage of  
22 our data, we considered further the probability for CoC, as distant relatives of crop plants, to  
23 share some habitats with cultivated plants in the agricultural or summer grazing areas. The  
24 eco-geographical analysis reveals that on average 20.1 ± 15.3 % of the CoC are located  
25 within the agricultural area (Table 3). This is not significantly more than the distributions of  
26 the null model (26 ± 1 %; p-val of a two-sample t-test = 1; Table 3) but it is noticeable that 82  
27 species (28.8 % of the CoC) are significantly more distributed in the agricultural area than  
28 expected by chance (Appendix S7). Finally, CoC are not significantly more distributed in  
29 summer grazing areas. On average, 4.8 ± 7.8 % of their distribution is located within  
30 summer grazing areas, whereas 9.2 ± 0.6 % of the random distributions fall within summer  
31 grazing areas (p-value of a two-sample t-test = 1; Table 3). Nevertheless, 43 species (15.1  
32 %) are significantly more present in summer grazing areas than expected by chance  
33 (Appendix S7).

34

#### 35 *Minimal conservation network of CoC for an adapted in situ conservation*

36 The minimal spatial network to cover at least one population of all the 285 CWR taxa  
37 consists of 39 2-by-2 kilometres squares, mostly located in South-western Switzerland



1 (Figure 1 a). In these 39 sites, the proportion of protected area ranges from 0% to 51%, with  
2 an average of 8% (Appendix S8). The proportion of agricultural and summer grazing areas  
3 dedicated to summer grazing in these “hotspots” ranges from 0.8 to 86%, with an average of  
4 35.2 % (Appendix S8). Interestingly, the proportion of protected area within the hotspots is  
5 not correlated with the proportion of agricultural area (Pearson’s correlation  $P = 0.029$ ;  $p\text{-val} = 0.862$ ),  
6 neither with the summer grazing (Pearson’s correlation  $P = -0.071$ ;  $p\text{-val} = 0.668$ ).

7

## 8 **Discussion**

### 9 *Adapting conservation priorities in a changing environment: the Swiss CWR inventory*

10 Following a global effort to improve the conservation effort of CWR globally (Vincent et al.  
11 2013), we took advantage of the recently updated checklist of the Swiss flora (Infoflora  
12 2017) to generate a comprehensive country-wide CWR inventory. With an overwhelming  
13 60% of its entire flora being considered as CWR, including a significant number of plants  
14 relative to medicinal plants (1,438, Table 2), this checklist had to be prioritized. This process  
15 identifies CoC and allows a dedicated set of measures depending on their respective  
16 conservation status: while the most vulnerable taxa are or will be included in current  
17 conservation plans, other less threatened taxa may benefit from some monitoring of their  
18 populations. Combining four sets of criteria (relationship to cultivated species, degree of  
19 relationship, red-list status and origin of the taxa) and validated by experts, we short-listed  
20 285 CoC taxa that will be targeted by various dedicated measures, depending on their  
21 conservation status. Logically, our priority list partially overlaps with the recently published  
22 European priority list (Rubio Teso et al. 2021).

23 While the IUCN red list and the list of the National Priority Species are key elements to  
24 identify taxa that are immediately threatened and will be central to identifying CoC that are in  
25 need of active conservation measures. But the list of CoC also contains taxa that are not  
26 threatened, while important from a breeding perspective. For example, *Daucus carota* or the  
27 various *Festuca* (*rubra*, *pratensis*, *ovina*...), are not particularly threatened according to our  
28 ecogeographical analysis (Appendix S6). However, these taxa remain an important target for  
29 CWR conservation to maintain genetic diversity within the genera of relevant crops (Khoury  
30 et al. 2022). In any case, the modularity of our approach may allow reshuffling the priority  
31 criteria and easily generating a new priority list that may be better suited for other  
32 stakeholders. This work provides the first step towards considering a portion of the  
33 biodiversity, namely the relatives to cultivated plants and wild-used plants as a valuable  
34 target for conservation policies.

35

36 *Filling the gaps in existing conservation measures to include CWR of Concern*

1 We then used ecogeographic tools to conduct a nationwide assessment of the  
2 conservation gaps for each of the CoC. We first assessed the extent of protection of CoC in  
3 existing protected areas. Our analysis shows that although the majority of the priority taxa is  
4 well covered by existing protected areas, 22.5 % of CoC are not significantly better protected  
5 than a randomly distributed species. It is obvious that for some of these species,  
6 prioritization was mostly due to their close relationship to cultivated crops rather than their  
7 conservation status (e.g. *Capsella bursa-pastoris*, *Lactuca serriola*, *Lolium multiflorum*).  
8 However, this list also reveals taxa that are threatened but currently not well covered by  
9 existing protection areas (e.g. *Allium rotundum*, *Alopecurus geniculatus*, *Chenopodium*  
10 *vulvaria*, *Fragaria moschata*, *Lactuca saligna*, *Taraxacum pacheri*). These species are to be  
11 found in habitats that are usually not covered by habitat inventories. For example, most of  
12 the dry meadows in Switzerland are in the “dry meadows and pasture” federal inventory  
13 where they profit from adequate protection despite occurring usually in environments that  
14 are outside protected areas. This conservation gap might be due to the protected areas not  
15 necessarily targeting the CWR specifically or to an overall limited distribution and efficiency  
16 of the existing protected areas (Guntern et al. 2013). Biodiversity loss is severe in  
17 Switzerland, which is far from reaching Aichi’s targets (initially aimed for 2020, FOEN 2017).  
18 Currently, protected areas cover only 12.5 % of the country (FOEN 2017). More efforts have  
19 to be performed in the protection of natural habitats in general, including the CoC species  
20 which are already covered by the current network of protected areas. Globally, similar trends  
21 have been observed for red list plants “used for human food”, with only 47% not covered by  
22 protected areas (FAO 2010). The protection gap observed for CoC might therefore benefit  
23 from more dedicated actions, like the identification of hotspots relevant for *in situ*  
24 conservation. Several successful examples of CWR-specific protected areas have been  
25 documented, while issues related to the required standards and conflicts with local land  
26 management policies were reported (Iorondo et al., 2012, Fielder et al., 2015). Based on the  
27 rationale that CWR might share, to a certain extent, similar ecogeographic zones with the  
28 crop they are related to, we concentrate next on the potential for the agricultural areas to be  
29 better considered in the CWR conservation strategy.

30

### 31 *Agriculture land management as levies for CWR conservation*

32 A large portion of the CoC populations were found in relatively lower altitudes, as well as  
33 their respective deficit regions. The deficit in floristic quality could be confirmed in the lower  
34 and intensively cultivated areas compared to higher lands, as observed before (Meier et al.  
35 2021). However, our analysis also shows that areas with a higher sampling effort have much  
36 less deficit of CoC species richness, suggesting that this apparent deficit might be also due  
37 to a lack of observation data.

1 Comparing observed and modelled stacked species distributions is sensitive because  
2 stacking potential distribution is known to systematically overpredict species' richness  
3 (Benito et al. 2013; Calabrese et al. 2014; Schmitt et al. 2017). Likewise, this would  
4 artificially increase the modelled deficit. Our study shows that the amount of modelled  
5 species richness is highly dependent on the choice of the threshold used to binarise the  
6 species' continuous suitability map (Appendix S3 and S4). However, the distribution pattern  
7 of the modelled species' richness remains stable across the thresholding strategies  
8 (Appendix S3 and 4). This suggests that a standardisation such as quantile normalization to  
9 rescale the modelled species' richness with the observed one, might provide a simple and  
10 conservative approach to map areas with an important difference between observed and  
11 modelled richness due to methodological bias.

12 Based on these observations, and again on the assumption that species that are related to  
13 cultivated species might share their ecological niche, we wanted to evaluate the extent to  
14 which the CoC populations were localized on the agricultural land. To our knowledge, there  
15 have been few (if any) attempts to try to evaluate the overlap between cultivated lands and  
16 CWR. Our analysis shows that 43.9 % of the CoC are more frequently distributed in  
17 agricultural or summer grazing areas. This important fraction supports that CWR could be an  
18 element to be integrated into the complex set of measures dedicated to the ecological  
19 compensation areas to promote farmland biodiversity (Aviron et al. 2009). The current  
20 analysis identified an interesting group of taxa, which shows on one hand bad coverage by  
21 protected areas, and on the other hand a significant part of their distribution in agricultural or  
22 summer grazing areas. For these 30 taxa (10.5 % of the CoC), agricultural measures and  
23 policies may help to better conserve these species. For example, *Valerianella dentata* is a  
24 characteristic cornfield plant found on lighter, more calcareous arable land, particularly  
25 overlying chalk (Appendix S5). Even though this species has a wide global distribution, its  
26 populations have diminished considerably and it is considered a vulnerable (VU) species on  
27 the national Red List (Bornand et al 2016). This decline has been a result of the intensive  
28 use of herbicide and the application of nitrogenous fertilizers to highly competitive modern  
29 crop varieties. It has been shown that the species can be successfully aided by adequate  
30 management of wheat fields and it is, therefore, a perfect example of an endangered  
31 species and close relative to a widely used crop.

32 In Switzerland, since 2018, a new *ad hoc* plan promotes *in situ* conservation of some  
33 forage crop populations. These measures target an overall surface of 2,750 ha under a  
34 dedicated cross-compliance scheme and target specifically 24 CoC. Interestingly, when  
35 considering forage plants, some conflicting aims could be identified, namely between the  
36 short-listing performed by the botanists and the farmer's priorities. For example, *Poa trivialis*  
37 listed here as a CoC, is also considered a common weed of grazing surfaces by many

1 farmers. This is a practical case that shows the strong need to guarantee the inclusion of all  
2 relevant stakeholders in the process of designing CWR conservation policy.

3 To better target potential conservation plans locally, in the last step of our analysis, we  
4 identified a network of 39 sites all over the country that allows a comprehensive coverage of  
5 all 285 CoC (Fig. 1a). Interestingly, the majority of these sites are localized in the hotter and  
6 drier climate of Switzerland optimal for agriculture (Holzkämper et al. 2015), suggesting a  
7 particularly promising area for implementation of further measures. Again here, about one-  
8 third of this conservation network is in agricultural or summer grazing areas, supporting that  
9 these surfaces are critical for an efficient conservation strategy of CWR. Because our  
10 distribution dataset mainly relies on opportunistic observations without any sampling design,  
11 the distribution of this network might be sensitive to the distribution of the sampling effort. If  
12 novel areas get better sampled, this can possibly affect the distribution of rare CoC and  
13 therefore modify the distribution of this complementary network. Such a network dedicated  
14 to *in situ* conservation of CoC could integrate information on the modelled species  
15 distribution (Guisan et al. 2013; Tulloch et al. 2016) to be less exposed to the influence of  
16 sampling effort. Another advantage of SDMs is the possible inclusion of climate or land use  
17 scenarios to project potential distributions in the future so that conservation networks could  
18 anticipate future distributional changes (Faleiro et al. 2013; Mateo et al. 2019). The current  
19 analysis can be used as a first step to synthesise current knowledge about CoC. Combining  
20 prospective field campaigns and potential distribution analyses integrating global change  
21 scenarios would inform how to complete current national monitoring such as the Swiss  
22 Biodiversity Monitoring (FOEN 2014) or the Agricultural Species and Habitats Monitoring  
23 Programme (Riedel et al. 2018) to develop efficient monitoring of the CoC.

24

### 25 *Raising synergies between conservation and agriculture*

26 The objective of the current study was to set the ground for a comprehensive and  
27 sustainable strategy for CWR conservation in Switzerland. Conservation of CWR remains a  
28 “grey zone” as much for conservationists as for farmers or policymakers. If we are to meet  
29 the United Nations Convention on Biological Diversity global strategy for plant conservation,  
30 which states in its objective n°9, that “70 per cent of genetic diversity crops, including their  
31 wild relatives and other socio-economically valuable plants species {should be} conserved”  
32 (Convention for Biological Diversity 2011), a synergy between sectors appears urgent. The  
33 significant enrichment of CoC on the agricultural surface may be a specificity of the Swiss  
34 landscape, and the extent to which this can be extrapolated to other agroecosystems  
35 remains to be determined. However, the interaction between CWR and agriculture appears  
36 largely unexplored. Addressing the rapid loss of biodiversity in the near future, that in turn  
37 may directly impact our agroecosystem resilience, will require a cross-sectoral approach

1 (Frison et al. 2011). We believe we provide here a compelling example of how the CWR  
2 conservation is a particularly good first stepping stone for enhancing synergies between  
3 agriculture and conservation.

4

5

6

## 7 **References**

8

- 9 Amaratunga D, Cabrera J. 2001. Analysis of Data From Viral DNA Microchips. *Journal of the*  
10 *American Statistical Association* **96**:1161–1170.
- 11 Araujo M, New M. 2007. Ensemble forecasting of species distributions. *Trends in Ecology &*  
12 *Evolution* **22**:42–47.
- 13 Aviron S, Nitsch H, Jeanneret P, Buholzer S, Luka H, Pfiffner L, Pozzi S, Schüpbach B,  
14 Walter T, Herzog F. 2009. Ecological cross compliance promotes farmland  
15 biodiversity in Switzerland. *Frontiers in Ecology and the Environment* **7**:247–252.
- 16 Benito BM, Cayuela L, Albuquerque FS. 2013. The impact of modelling choices in the  
17 predictive performance of richness maps derived from species-distribution models:  
18 guidelines to build better diversity models. *Methods in Ecology and Evolution* **4**:327–  
19 335.
- 20 Bolstad BM, Irizarry RA, Astrand M, Speed TP. 2003. A comparison of normalization  
21 methods for high density oligonucleotide array data based on variance and bias.  
22 *Bioinformatics* **19**:185–193.
- 23 Bornand C., Gygax A., Juillerat P., Jutzi M., Möhl A., Rometsch S., Sager L., Santiago H.,  
24 Eggenberg S. 2016: Rote Liste Gefässpflanzen. Gefährdete Arten der Schweiz.  
25 Bundesamt für Umwelt, Bern und Info Flora, Genf. Umwelt-Vollzug Nr. 1621: 178 S.
- 26 Brehm JM, Maxted N, Ford-Lloyd BV, Martins-Loução MA. 2008. National inventories of  
27 crop wild relatives and wild harvested plants: case-study for Portugal. *Genetic*  
28 *Resources and Crop Evolution* **55**:779–796.
- 29 Breiner FT, Guisan A, Bergamini A, Nobis MP. 2015. Overcoming limitations of modelling  
30 rare species by using ensembles of small models. *Methods in Ecology and Evolution*  
31 **6**:1210–1218.
- 32 Calabrese JM, Certain G, Kraan C, Dormann CF. 2014. Stacking species distribution models  
33 and adjusting bias by linking them to macroecological models: Stacking species  
34 distribution models. *Global Ecology and Biogeography* **23**:99–112.
- 35 Castañeda-Álvarez NP et al. 2016. Global conservation priorities for crop wild relatives.  
36 *Nature plants* **2**:16022.
- 37 Cero MD, Saller R, Weckerle CS. 2014. The use of the local flora in Switzerland: a  
38 comparison of past and recent medicinal plant knowledge. *Journal of*  
39 *ethnopharmacology* **151**:253–64.
- 40 Convention for Biological Diversity. 2011. Global Strategy for Plant Conservation. Available  
41 from <https://www.cbd.int/gspc>.
- 42 Dempewolf H, Baute G, Anderson J, Kilian B, Smith C, Guarino L. 2017. Past and Future  
43 Use of Wild Relatives in Crop Breeding. *Crop Science* **57**:1070.
- 44 Elith J, Leathwick JR. 2009. Species Distribution Models: Ecological Explanation and  
45 Prediction Across Space and Time. *Annual Review of Ecology, Evolution, and*  
46 *Systematics* **40**:677–697.
- 47 Engels JMM, Thormann I. 2020. Main Challenges and Actions Needed to Improve  
48 Conservation and Sustainable Use of Our Crop Wild Relatives. *Plants* **9**:968.
- 49 Faleiro FV, Machado RB, Loyola RD. 2013. Defining spatial conservation priorities in the  
50 face of land-use and climate change. *Biological Conservation* **158**:248–257.

- 1 FAO. 2010. The Second Report on the State of the World's Plant Genetic Resources for
- 2 Food and Agriculture. Available from [www.fao.org/3/i1500e/i1500e.pdf](http://www.fao.org/3/i1500e/i1500e.pdf).
- 3 Fielder H, Brotherton P, Hosking J, Hopkins JJ, Ford-Lloyd B, Maxted N. 2015. Enhancing
- 4 the Conservation of Crop Wild Relatives in England. *PLOS ONE* **10**:e0130804.
- 5 FOAG. 2022. Swiss national genebank for Plant Genetic Resources for Food and
- 6 Agriculture. Available from [www.pgrel.admin.ch/pgrel/](http://www.pgrel.admin.ch/pgrel/) (accessed September 1,
- 7 2022).
- 8 FOAG, FOEN. 2013. Operationalisierung der Umweltziele Landwirtschaft. ART-
- 9 Schriftenreihe:136.
- 10 FOEN. 2014. Biodiversity Monitoring Switzerland. Available from
- 11 [https://www.bafu.admin.ch/bafu/en/home/topics/biodiversity/publications-](https://www.bafu.admin.ch/bafu/en/home/topics/biodiversity/publications-studies/publications/biodiversity-monitoring.html)
- 12 [studies/publications/biodiversity-monitoring.html](https://www.bafu.admin.ch/bafu/en/home/topics/biodiversity/publications-studies/publications/biodiversity-monitoring.html).
- 13 FOEN. 2017. Biodiversität in der Schweiz: Zustand und Entwicklung. Ergebnisse des
- 14 Überwachungssystems im Bereich Biodiversität, Stand 2016. Umwelt Zustand Nr.
- 15 1630.
- 16 FOEN. 2018. Opendata.Swiss. Available from
- 17 <https://opendata.swiss/en/organization/bundesamt-fur-umwelt-bafu/>.
- 18 FOEN. 2019. Available from
- 19 [https://www.bafu.admin.ch/bafu/fr/home/themes/biodiversite/publications/publications](https://www.bafu.admin.ch/bafu/fr/home/themes/biodiversite/publications/publications-biodiversite/liste-especes-prioritaires-nationales.html)
- 20 [-biodiversite/liste-especes-prioritaires-nationales.html](https://www.bafu.admin.ch/bafu/fr/home/themes/biodiversite/publications/publications-biodiversite/liste-especes-prioritaires-nationales.html).
- 21 Frison EA, Cherfas J, Hodgkin T. 2011. Agricultural Biodiversity Is Essential for a
- 22 Sustainable Improvement in Food and Nutrition Security. *Sustainability* **3**:238–253.
- 23 García RM, Parra-Quijano M, Iriondo JM. 2017. A Multispecies Collecting Strategy for Crop
- 24 Wild Relatives Based on Complementary Areas with a High Density of
- 25 Ecogeographical Gaps. *Crop Science* **57**:1059–1069.
- 26 Guisan A et al. 2013. Predicting species distributions for conservation decisions. *Ecology*
- 27 *Letters* **16**:1424–1435.
- 28 Guisan A, Rahbek C. 2011. SESAM - a new framework integrating macroecological and
- 29 species distribution models for predicting spatio-temporal patterns of species
- 30 assemblages: Predicting spatio-temporal patterns of species assemblages. *Journal*
- 31 *of Biogeography* **38**:1433–1444.
- 32 Guisan A, Thuiller W. 2005. Predicting species distribution: offering more than simple habitat
- 33 models. *Ecology Letters* **8**:993–1009.
- 34 Guntern J, Lachat T, Pauli D, Fischer M. 2013. Flächenbedarf für die Erhaltung der
- 35 Biodiversität und der Ökosystemleistungen in der Schweiz. Page 234.
- 36 Hajjar R, Hodgkin T. 2007. The use of wild relatives in crop improvement: a survey of
- 37 developments over the last 20 years. *Euphytica* **156**:1–13.
- 38 Häner R, Schiercher B, Kleijer G, Rometsch S, Holderegger R. 2009. Crop wild relatives
- 39 conservation. *AGRARForschung* **16**:204–209.
- 40 Harlan JR, Wet JMJ. 1971. TOWARD A RATIONAL CLASSIFICATION OF CULTIVATED
- 41 PLANTS. *TAXON* **20**:509–517.
- 42 Hicks SC, Irizarry RA. 2015. quantro: a data-driven approach to guide the choice of an
- 43 appropriate normalization method. *Genome Biology* **16**:117.
- 44 Holzkämper A, Fossati D, Hiltbrunner J, Fuhrer J. 2015. Spatial and temporal trends in agro-
- 45 climatic limitations to production potentials for grain maize and winter wheat in
- 46 Switzerland. *Regional Environmental Change* **15**:109–122.
- 47 Infoflora. 2017. Checklist 2017 of Swiss vascular plants. Available from
- 48 <https://www.infoflora.ch/fr/flore/taxonomie/checklist.html>.
- 49 Jarrett P, Moser C. 2013. The Agri-food Situation and Policies in Switzerland. OECD
- 50 Economics Department.
- 51 Jarvis S, Fielder H, Hopkins J, Maxted N, Smart S. 2015. Distribution of crop wild relatives of
- 52 conservation priority in the UK landscape. *Biological Conservation* **191**:444–451.
- 53 Kell S, Knüffer H, Jury S, Ford-Lloyd B, Maxted N. 2008. Crops and Wild Relatives of Europ-
- 54 Mediterranean Region: Making and Using a Conservation Catalogue. Pages 69–109
- 55 Crop Wild Relative Conservation and Use.

- 1 Khoury CK, Greene S, Wiersema J, Maxted N, Jarvis A, Struik PC. 2013. An Inventory of
- 2 Crop Wild Relatives of the United States. *Crop Science* **53**:1496–1508.
- 3 Khoury CK et al. 2022. Crop genetic erosion: understanding and responding to loss of crop
- 4 diversity. *New Phytologist* **233**:84–118.
- 5 Mateo RG, Gastón A, Aroca-Fernández MJ, Broennimann O, Guisan A, Saura S,
- 6 García-Viñas JI. 2019. Hierarchical species distribution models in support of vegetation
- 7 conservation at the landscape scale. *Journal of Vegetation Science* **30**:386–396.
- 8 Maxted N, Ford-Lloyd BV, Jury S, Kell S, Scholten M. 2006. Towards a definition of a crop
- 9 wild relative. *Biodiversity and Conservation* **15**:2673–2685.
- 10 Maxted N, Kell S, Ford-Lloyd B, Dulloo E, Toledo Á. 2012. Toward the Systematic
- 11 Conservation of Global Crop Wild Relative Diversity. *Crop Science* **52**:774.
- 12 Maxted N, Scholten M, Codd R, Ford-Lloyd B. 2007. Creation and use of a national
- 13 inventory of crop wild relatives. *Biological Conservation* **140**:142–159.
- 14 Meier E, Lüscher G, Buholzer S, Herzog F, Indermaur A, Riedel S, Winizki J, Hofer G, Knop
- 15 E. 2021. Zustand der Biodiversität in der Schweizer Agrarlandschaft Zustandsbericht
- 16 ALL-EMA 2015–2019. *Agroscope Science* 111.
- 17 Phillips J, Asdal Å, Brehm JM, Rasmussen M, Maxted N. 2016. In situ and ex situ diversity
- 18 analysis of priority crop wild relatives in Norway. *Diversity and Distributions* **22**:1112–
- 19 1126.
- 20 Rebelos T. 2014. Iterative selection procedures-centres of endemism and optimal placement
- 21 of reserves Hybridisation in the Cape Fynbos and Australian Kwongan. *VegMAP*.
- 22 R Core Team. 2020. R: A language and environment for statistical computing. R Foundation
- 23 for Statistical Computing,. Available from <http://www.R-project.org/>.
- 24 Riedel S et al. 2018. ALL-EMA Methodology Report Agricultural Species and Habitats.
- 25 *Agroscope Science*:1–32.
- 26 Rubio Teso M, Alvarez Muniz C, Gaisberger H, Kell S, Lara-Romero C, Magos Brehm J,
- 27 Iriondo J, Maxted M. 2021. In situ plant genetic resources in Europe: crop wild
- 28 relatives. *Farmer's pride*. Available from <https://hdl.handle.net/10568/110921>.
- 29 Schmitt S, Pouteau R, Justeau D, Boissieu F, Birnbaum P. 2017. `ssdm`: An r package to
- 30 predict distribution of species richness and composition based on stacked species
- 31 distribution models. *Methods in Ecology and Evolution* **8**:1795–1803.
- 32 Simonnet X, Quennoz M, Carlen C. 2008. New artemisia annua hybrids with high artemisinin
- 33 content. *Acta Horticulturae*:371–373.
- 34 Suter D, Frick R, Hirschi HU. 2019. Liste der empfohlenen Sorten von Futterpflanzen 2019–
- 35 2020. *AGRARForschung* **10**:1–16.
- 36 Szerencsits E, Prasuhn V, Churko G, Herzog F, Utiger C, Zihlmann U, Walter T, Gramlich A.
- 37 2018. Karte potenzieller Feucht-(Acker-)Flächen in der Schweiz. *Agroscope*.
- 38 Tas N, West G, Kircalioglu G, Topaloglu SB, Phillips J, Kell S, Maxted N. 2019.
- 39 Conservation gap analysis of crop wild relatives in Turkey. *Plant Genetic Resources:*
- 40 *Characterization and Utilization* **17**:164–173.
- 41 Taylor NG, Kell SP, Holubec V, Parra-Quijano M, Chobot K, Maxted N. 2017. A systematic
- 42 conservation strategy for crop wild relatives in the Czech Republic. *Diversity and*
- 43 *Distributions* **23**:448–462.
- 44 Thuiller W, Araújo MB, Pearson RG, Whittaker RJ, Brotons L, Lavorel S. 2004. Uncertainty
- 45 in predictions of extinction risk. *Nature* **430**:34–34.
- 46 Treuren R van, Hoekstra R, Hintum TJL van. 2017. Inventory and prioritization for the
- 47 conservation of crop wild relatives in The Netherlands under climate change.
- 48 *Biological Conservation* **216**:123–139.
- 49 Tulloch AIT, Sutcliffe P, Naujokaitis-Lewis I, Tingley R, Brotons L, Ferraz KMPMB,
- 50 Possingham H, Guisan A, Rhodes JR. 2016. Conservation planners tend to ignore
- 51 improved accuracy of modelled species distributions to focus on multiple threats and
- 52 ecological processes. *Biological Conservation* **199**:157–171.
- 53 Vincent H, Amri A, Castañeda-Álvarez NP, Dempewolf H, Dulloo E, Guarino L, Hole D, Mba
- 54 C, Toledo A, Maxted N. 2019. Modeling of crop wild relative species identifies areas
- 55 globally for in situ conservation. *Communications Biology* **2**:136.

- 1 Vincent H, Wiersema J, Kell S, Fielder H, Dobbie S, Castañeda-Álvarez NP, Guarino L,  
2 Eastwood R, León B, Maxted N. 2013. A prioritized crop wild relative inventory to  
3 help underpin global food security. *Biological Conservation* **167**:265–275.  
4 Vouillamoz JF, Carron C-A, Malnoë P, Baroffio CA, Carlen C. 2012. *Rhodiola rosea*  
5 “mattmark”, the first synthetic cultivar is launched in switzerland. *Acta*  
6 *Horticulturae*:185–189.

7  
8  
9

## 10 Acknowledgements

11 This study has been funded by the Swiss Federal Office for Agriculture (grant n° 05-NAP-  
12 P57). We would like to thank Raphael Häner, Jérôme Frey for helpful discussion; Andreas  
13 Gygax and Stefan Eggenberg for facilitating access to the floristic data.

14

## 15 Tables

16 **Table 1.** Summary - Checklist of CWR in Switzerland.

17 **Table 2.** List of CWR taxa according to their reported use.

18 **Table 3.** Average distribution of CoC in protected, agricultural and summer grazing areas.

19

20

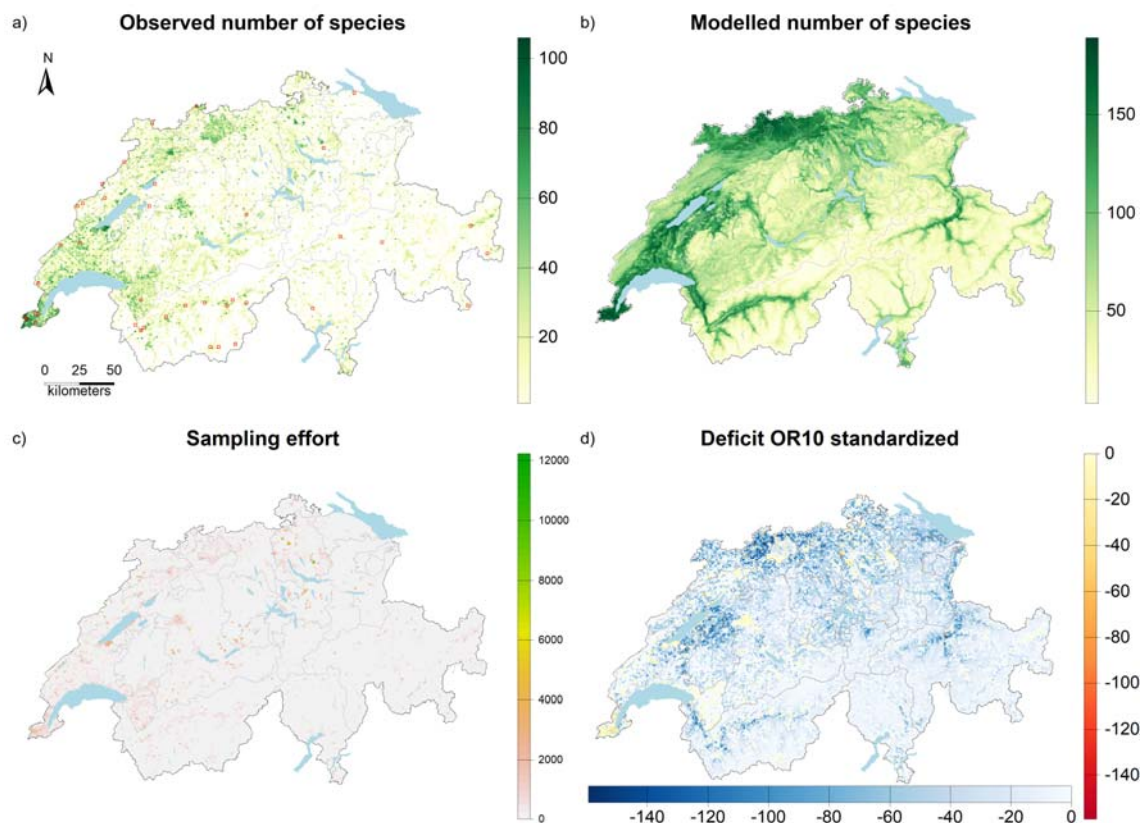

21

22

23 **Figure legends**



1 **Figure 1. a).** CWR of concern (CoC) were observed in Switzerland. Red sites represent the  
2 minimum number of sites to cover all CWR species in the country. b) Modelled distribution of  
3 CoC in Switzerland obtained by the stacking of the potential distribution of each priority  
4 CWR in Switzerland. c) Sampling effort represented by the number of observations for all  
5 plant species in the Infflora database for the period 2001-2019. d) Deficit area between  
6 observed and modelled distribution of CoC in areas with a high (yellow to red) or lower  
7 sampling effort (light to dark blue).  
8

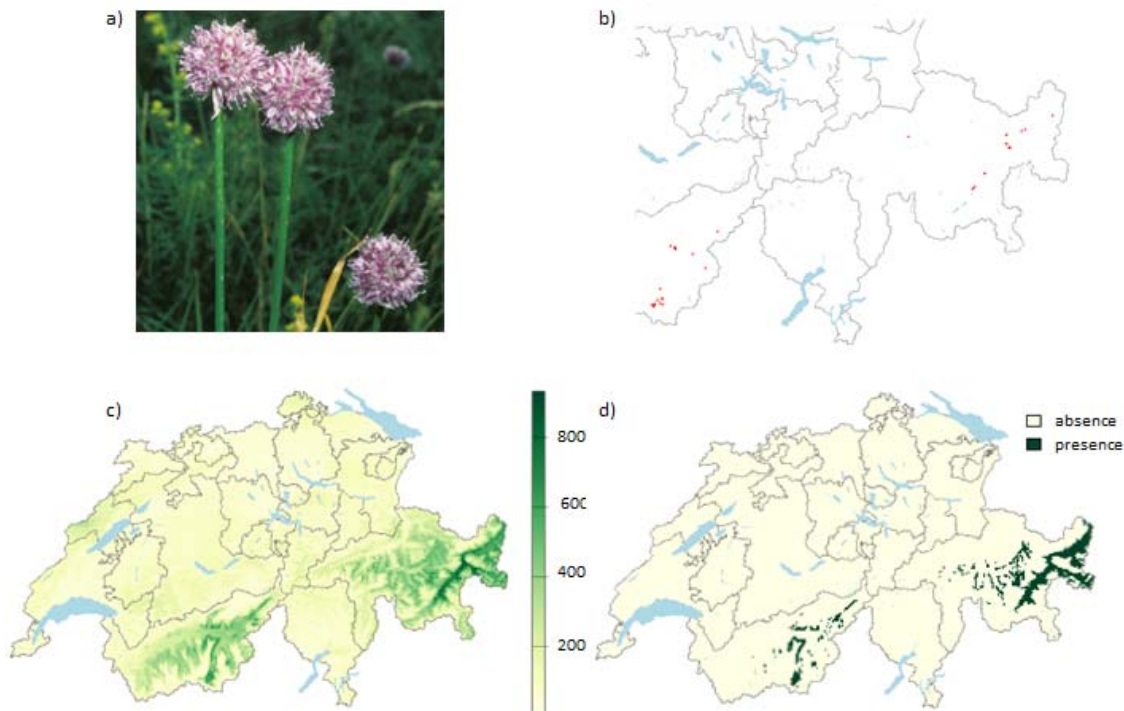

9  
10 **Figure 2.** *Allium lineare*, a CoC from onion (a) and its known distribution in Switzerland (b;  
11 each red dot is a single observation). Species distribution models produce continuous  
12 habitat suitability maps (c), which are binarised into a potential distribution map (d). Here,  
13 the omission ratio of 10 (OR10) was used but 4 others thresholding criteria were used  
14 (Appendix S6)

15

16

## 17 **Supporting Information**

18

19 **Appendix S1. Checklist of crops used in Switzerland.** Compiled list of crops for food and  
20 feed, aromatic, medicinal and ornamentals. Note that ornamental crops and their CWR were  
21 not used in the final CWR prioritization.

22

1 **Appendix S2. Checklist of Crop Wild Relatives (CWR) in Switzerland and prioritized**  
2 **CWR list.** A detailed list and nomenclature of the 2,226 CWR identified in the Swiss flora  
3 and the 285 CWR of Concern that have been short-listed in the current study.

4

5 **Appendix S3. List of the available environmental variables available for SDMS.** Each  
6 variable was assigned to a category: temperature (T), seasonality (S), extreme temperature  
7 (Tex), precipitation (P), aridity (A), topography (Topo), NDVI, forest height (Forest) and soil  
8 pH (pH). Each variable has a priority rank within its category for the preselection procedure.  
9 This procedure used a permutation test for which a minimum p-value (p-val th.) was required  
10 to keep the variable in the procedure.

11

12 **Appendix S4. Detailed method for SDMs.**

13

14 **Appendix S5. Actual and potential distributions for each taxa. Data available under**  
15 **the link: [10.6084/m9.figshare.21019963](https://doi.org/10.6084/m9.figshare.21019963)**

16

17 **Appendix S6. Results of the SDMs for CoC.** For each species, the number of  
18 observations used to calibrate the models (Nobs), the modelling type (ESM for an ensemble  
19 of small distribution models or EM for ensemble models) and different model evaluation  
20 indices are given. In orange, models with a “not-so-good” evaluation.

21

22 **Appendix S7. Results of the eco-geographical analysis for each CoC.** For each species  
23 we provide the number of observations used to describe the species' distribution, the IUCN  
24 red list status, the priority in the list of the National Priority Species (priority in NPS, see  
25 legend in Appendix S2), the proportion of the distribution located in protected area  
26 (protected [%]), unprotected surfaces in agricultural area (unprotected in AA [%]) and in  
27 unprotected surfaces in summer-grazing area (unprotected in SGA [%]). The distribution of  
28 each priority CWR has been compared with 1000 random distributions to estimate if the  
29 distribution was more frequent in protected area (rand. test reserve [p-val.]), in unprotected  
30 surfaces in agricultural area (rand. test AA [p-val.]) and in unprotected surfaces in summer-  
31 grazing area (rand.test SGA [p-val.])

32

33 **Appendix S8. List of 39 “CWR hotspots” that cover comprehensively the 285 CWR of**  
34 **Concern distribution.**

35

36

37

38

39

40

41

42

1  
2  
3  
4  
5  
6  
7

8 **Tables**

9 **Table 1. Checklist of CWR in Switzerland.** A checklist of CWR has been realised merging  
10 data from the European CWR list and the *Flora helvetica* latest version (2017). Only CWR  
11 related to cultivated crops (not considering ornamentals) have been considered further for  
12 prioritization.

13

|                                                                                                             | <b>No of CWR taxa</b> |
|-------------------------------------------------------------------------------------------------------------|-----------------------|
| Swiss CWR according to CWRIS (Kell et al., 2005)                                                            | 4'464                 |
| Swiss CWR checklist after correction using <i>Flora helvetica</i> (Infoflora, 2017)                         | 3'006<br>(60% Flora)  |
| <b>Swiss CWR checklist</b> (without neophytes and invasive species and without taxa related to ornamentals) | <b>2'226</b>          |
| CWR from PGRFA                                                                                              | 2'045                 |
| <b>CWR of Concern (incl. expert's opinion, see Methods)</b>                                                 | <b>285</b>            |
| CWR of Concern in the red list 2016                                                                         | 90                    |
| CWR of Concern in the list of the National Priority Species (FOEN)                                          | 92                    |

14  
15  
16  
17  
18  
19  
20  
21  
22

1  
2  
3  
4  
5  
6  
7  
8  
9  
10  
11  
12

**Table 2. List of CWR taxa according to their reported use.** This is based on the 2,226 taxa from the CWR checklist (Appendix S2). For each category, the number of taxa is indicated, as well as their degree of relationship (Documented Gene Pool or Taxon Group) and their status of conservation on the red list (IUCN, 2016). Note that some taxa can belong simultaneously to several categories.

|                                             | Food | Forage | Medicinal | Aromatic | Industrial<br>Restoration<br>Forestry |
|---------------------------------------------|------|--------|-----------|----------|---------------------------------------|
| <b>No of CWR taxa</b>                       | 334  | 211    | 1438      | 28       | 114                                   |
| <b>Documented relationship</b>              | 140  | 119    | 497       | 3        | 34                                    |
| <b>Conservation status (CR, EN, VU, DD)</b> | 62   | 30     | 300       | 2        | 27                                    |

13  
14  
15  
16  
17  
18  
19  
20  
21

**Table 3. Average distribution of CWR of Concern in protected, agricultural and summer grazing areas.** For comparison, we also provide the average distribution of the 1'000 random distributions of the null model. \*\*\* significantly more than randomly distributed (p-val < 0.001).

|                | Protected area [%] | Agricultural area [%] | Summer grazing area [%] |
|----------------|--------------------|-----------------------|-------------------------|
| CWR of Concern | 33.02 ± 21.4***    | 20.1 ± 15.3           | 4.8 ± 7.8               |

|                        |                |            |               |
|------------------------|----------------|------------|---------------|
| Random<br>distribution | $13.9 \pm 0.8$ | $26 \pm 1$ | $9.2 \pm 0.6$ |
|------------------------|----------------|------------|---------------|

1

---
